# Supplementary material
Source: PubMed Central journal article supplement (PMC5577963)

Figure e-1. Flow Chart

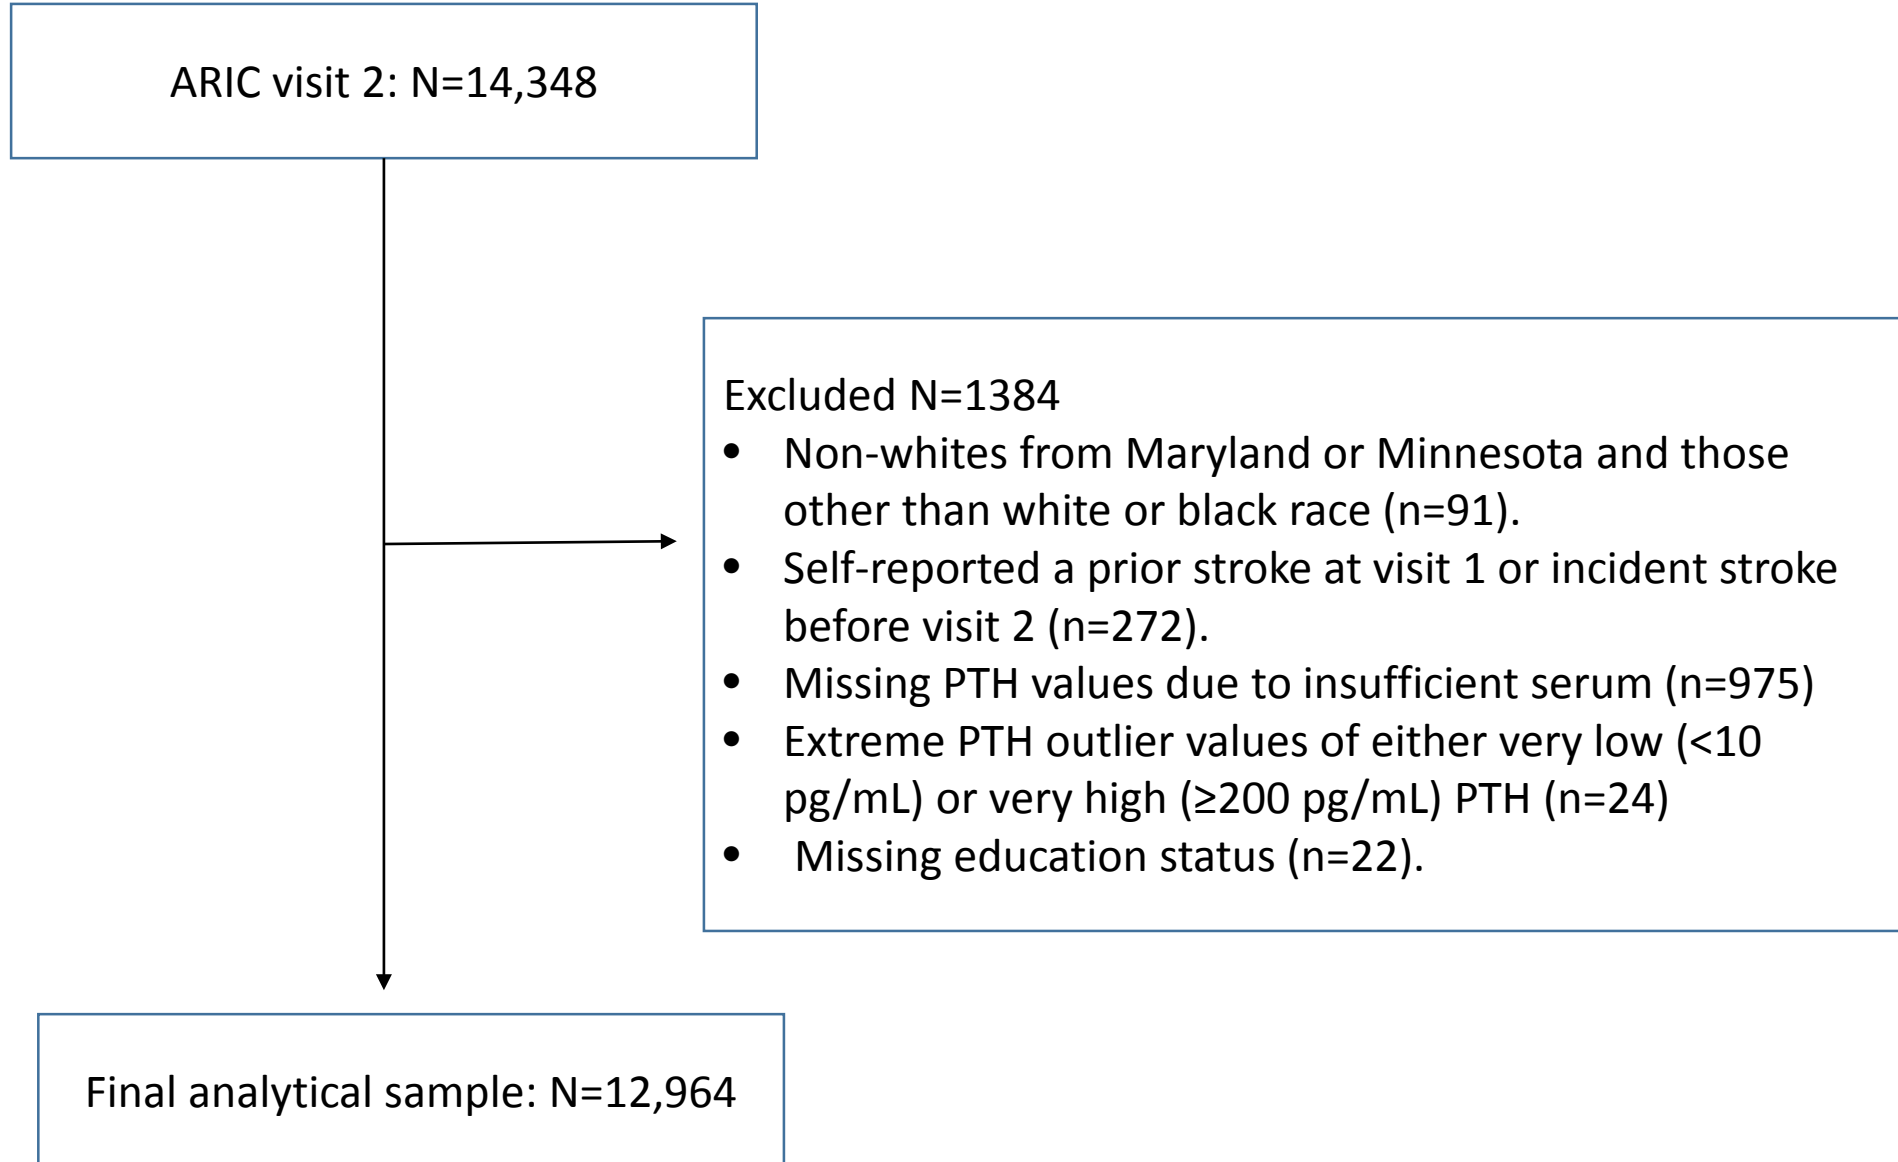

Supplement: supp_WNL.0000000000004290_Figure_e-1.pdf [file supp_WNL.0000000000004290_Figure_e-1.pdf]
